# Supplementary material for: Carbazole- and/or triphenylamine-based D–π–D multiarylamino dyes: synthesis, characterization and photophysical properties
Source: Royal Society of Chemistry journal article supplement (doi:10.1039/c7nj02657a), 2017-01-01
Supplement: c7nj02657a1.pdf [file c7nj02657a1.pdf]

*Electronic supplementary information for*

**Carbazole and/or triphenylamine-based D- $\pi$ -D multiarylamino dyes:  
Synthesis, characterization and photophysical properties**

Baodong Zhao <sup>b</sup>, Weidong Zhao <sup>b</sup>, Liujuan Yu <sup>b</sup>, Jie Li <sup>b</sup>, Yuming Zhao <sup>c</sup> and Tao Wang <sup>\*,a,b</sup>

<sup>a</sup> State Key Laboratory of Chemical Resource Engineering, College of Science, Beijing University of Chemical Technology, Beijing, 100029, People's Republic of China

<sup>b</sup> Department of organic chemistry, College of Science, Beijing University of Chemical Technology, Beijing, 100029, People's Republic of China

<sup>c</sup> Department of Chemistry, Memorial University, St. John's, NL, Canada A1B3X7.

\*Correspondence to: Tao Wang, Tel: 0086 010- 64445350; E-mail:wangtwj2000@163.com

**Contents**

**Fig. S1.** <sup>1</sup>H NMR spectra of carbazole (Cz) and triphenylamine (TPA).

**Fig. S2.** <sup>1</sup>H NMR spectra of DCzBu, DHeCzDCzBu and DTPADCzBu.

**Fig. S3.** <sup>1</sup>H NMR spectra of DCzBu, QHeCzDCzBu and QTPADCzBu.

**Fig. S4.** Comparison of UV-vis spectra of (a) DCzBu; (b) DHeCzDCzBu; (c) QHeCzDCzBu; (d) DTPADCzBu; (e). QTPADCzBu ( $1 \times 10^{-5}$  M) in THF and Toluene.

**Fig. S5.** Comparison of Normalized fluorescence spectra of (a) DCzBu; (b) DHeCzDCzBu; (c) QHeCzDCzBu; (d) DTPADCzBu; (e). QTPADCzBu ( $1 \times 10^{-6}$  M) in THF and Toluene.

**Fig. S6.** Comparison of (a) UV-vis spectra and (b) fluorescence spectra of QTPADCzBu ( $1 \times 10^{-5}$  M) Toluene before and after irradiated by 75 W halogen lamp ( $I = 10$  mW/cm<sup>2</sup>) for 5 min; (c) Plots of the intensity of the peak of the emission spectra of QTPADCzBu recorded by 20 times.

**Fig. S7.** Energy diagram for photoinduced electron transfer leading to fluorescence quenching.

**Fig. S8.** Cyclic voltmmetry curves of (a) DHeCzDCzBu; (b) QHeCzDCzBu; (c) DTPADCzBu; (d). QTPADCzBu in DMF ( $1 \times 10^{-3}$  M) using 0.1 M TBAP as the supporting electrolyte, recorded at 100 mV s<sup>-1</sup> scan speed.

**Fig. S9.** UV-vis spectra of BPO in THF at different concentrations.

**Table S1.** The optimized structure and part data of selected bond lengths, angles and dihedral angles of **DHeCzDCzBu**

**Table S2.** The optimized structure and part data of selected bond lengths, angles and dihedral angles of **QHeCzDCzBu**

**Table S3.** The optimized structure and part data of selected bond lengths, angles and dihedral angles of **DTPADCzBu**

**Table S4.** The optimized structure and part data of selected bond lengths, angles and dihedral angles of **QTPADCzBu**

**Table S5.** UV-vis absorption data of **DCzBu** and DCzBus in THF and Toluene ( $1 \times 10^{-5}$  M)

**Table S6.** Fluorescence data of **DCzBu** and DCzBus in THF and Toluene ( $1 \times 10^{-6}$  M)

**Table S7.** The calculation outcomes of the TPA cross-sections of DCzBus under different excitation laser wavelengths

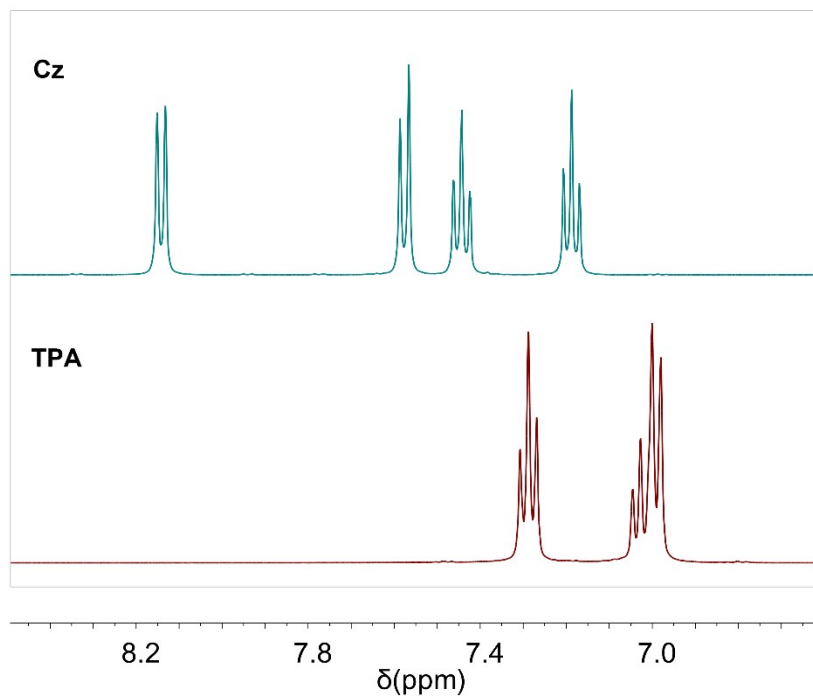

**Fig. S1.** <sup>1</sup>H NMR spectra of carbazole (**Cz**) and triphenylamine (**TPA**).

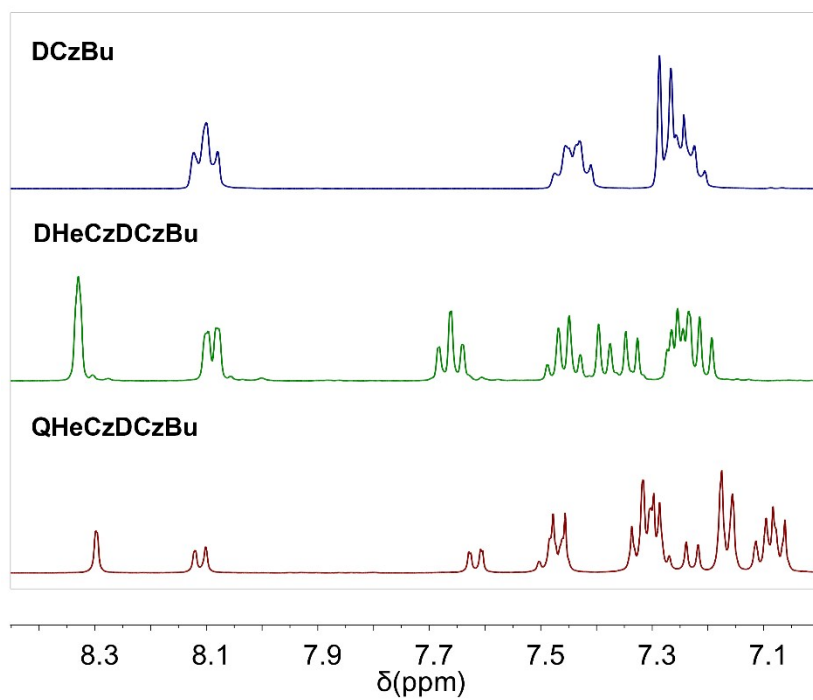

**Fig. S2.** <sup>1</sup>H NMR spectra of **DCzBu**, **DHeCzDCzBu** and **DTPADCzBu**.

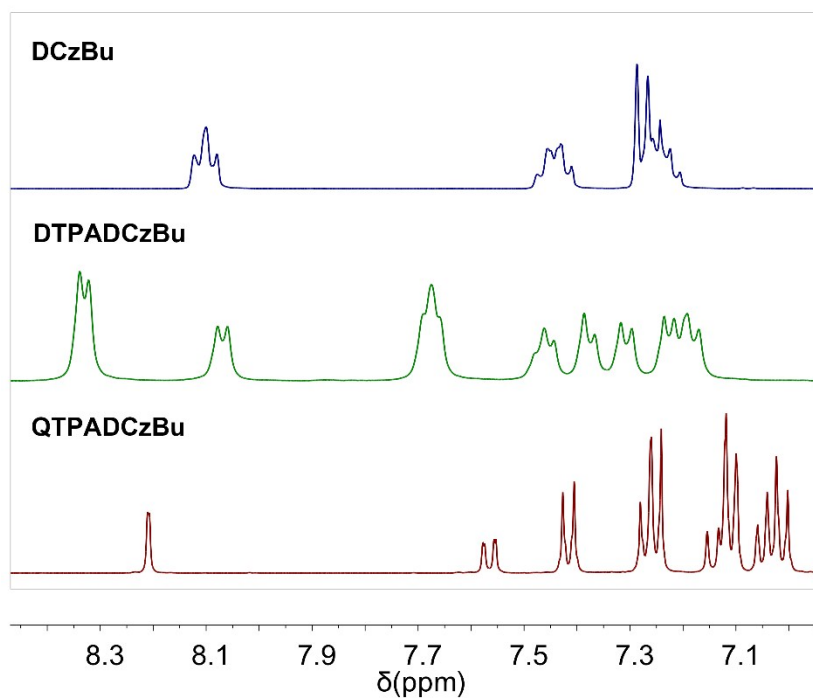

**Fig. S3.**  $^1\text{H}$  NMR spectra of DCzBu, QHeCzDCzBu and QTPADCzBu.

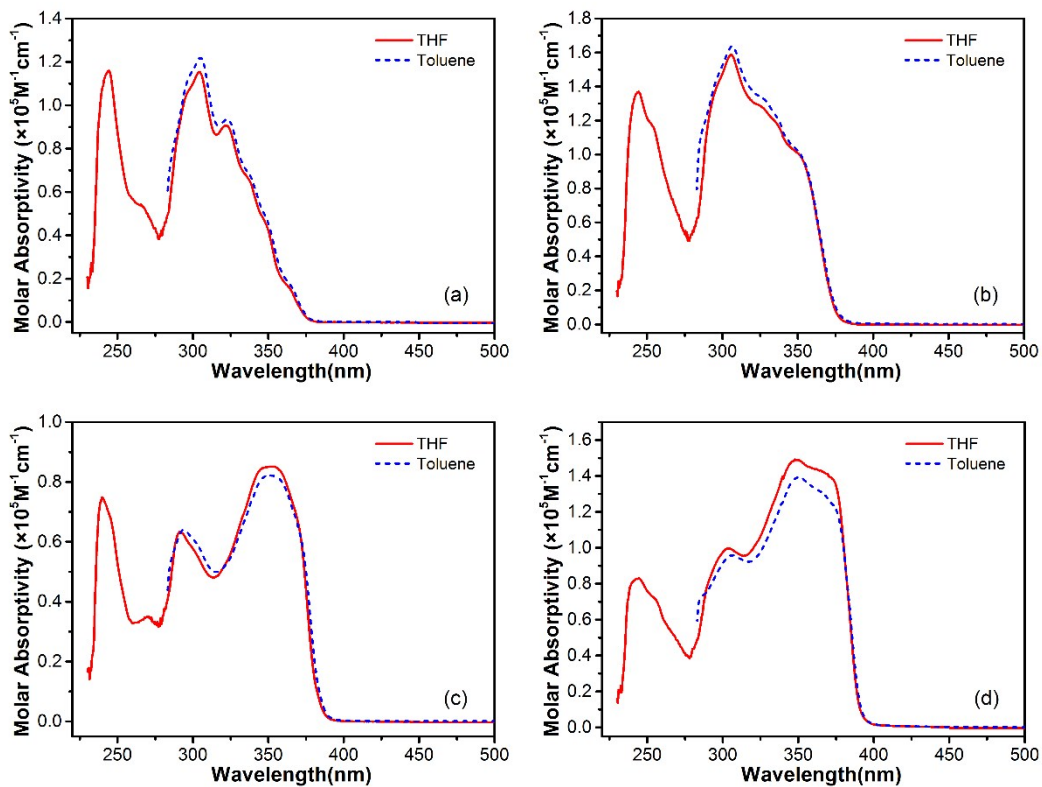

**Fig. S4.** Comparison of UV-vis spectra in THF and Toluene ( $1 \times 10^{-5}$  M) of (a) DHeCzDCzBu; (b) QHeCzDCzBu; (c) DTPADCzBu; (d). QTPADCzBu

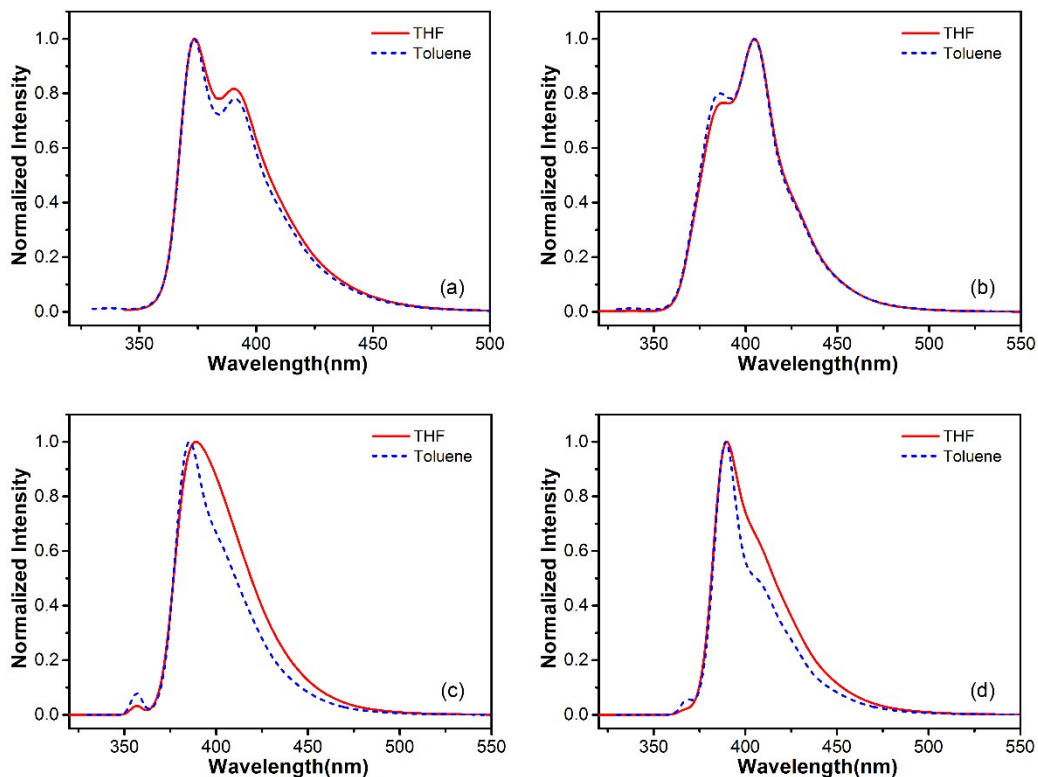

**Fig. S5.** Comparison of Normalized fluorescence spectra of in THF and Toluene ( $1 \times 10^{-6}$  M) (a) DHeCzDCzBu; (b) QHeCzDCzBu; (c) DTPADCzBu; (d). QTPADCzBu.

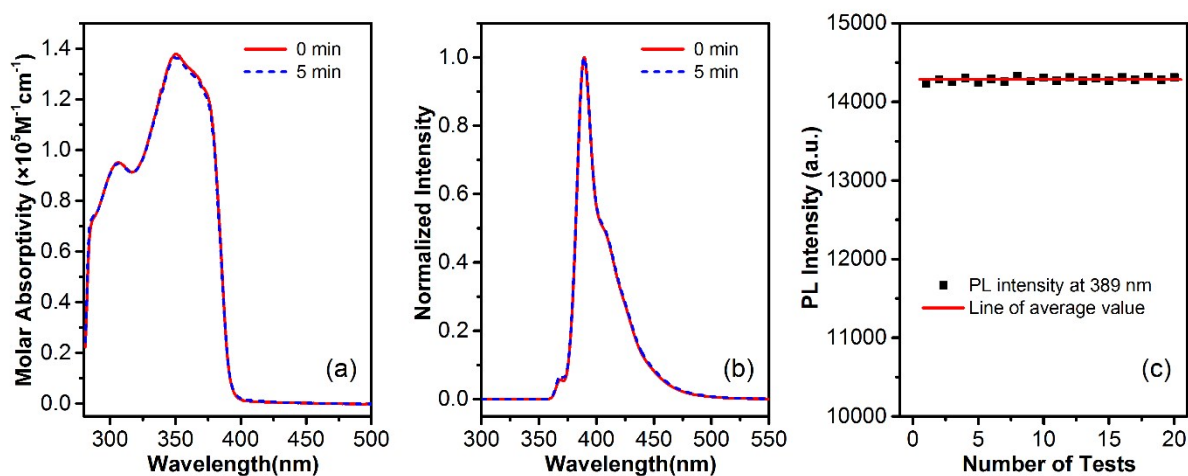

**Fig. S6.** Comparison of (a) UV-vis spectra and (b) fluorescence spectra of QTPADCzBu ( $1 \times 10^{-5}$  M) Toluene before and after irradiated by 75 W halogen lamp ( $I = 10$  mW/cm<sup>2</sup>) for 5 min; (c) Plots of the intensity of the peak of the emission spectra of QTPADCzBu recorded by 20 times.

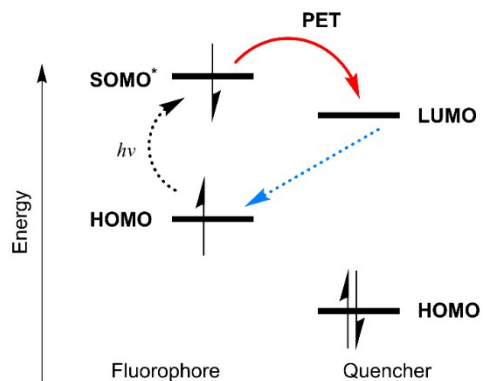

**Fig. S7.** Energy diagram for photoinduced electron transfer leading to fluorescence quenching.

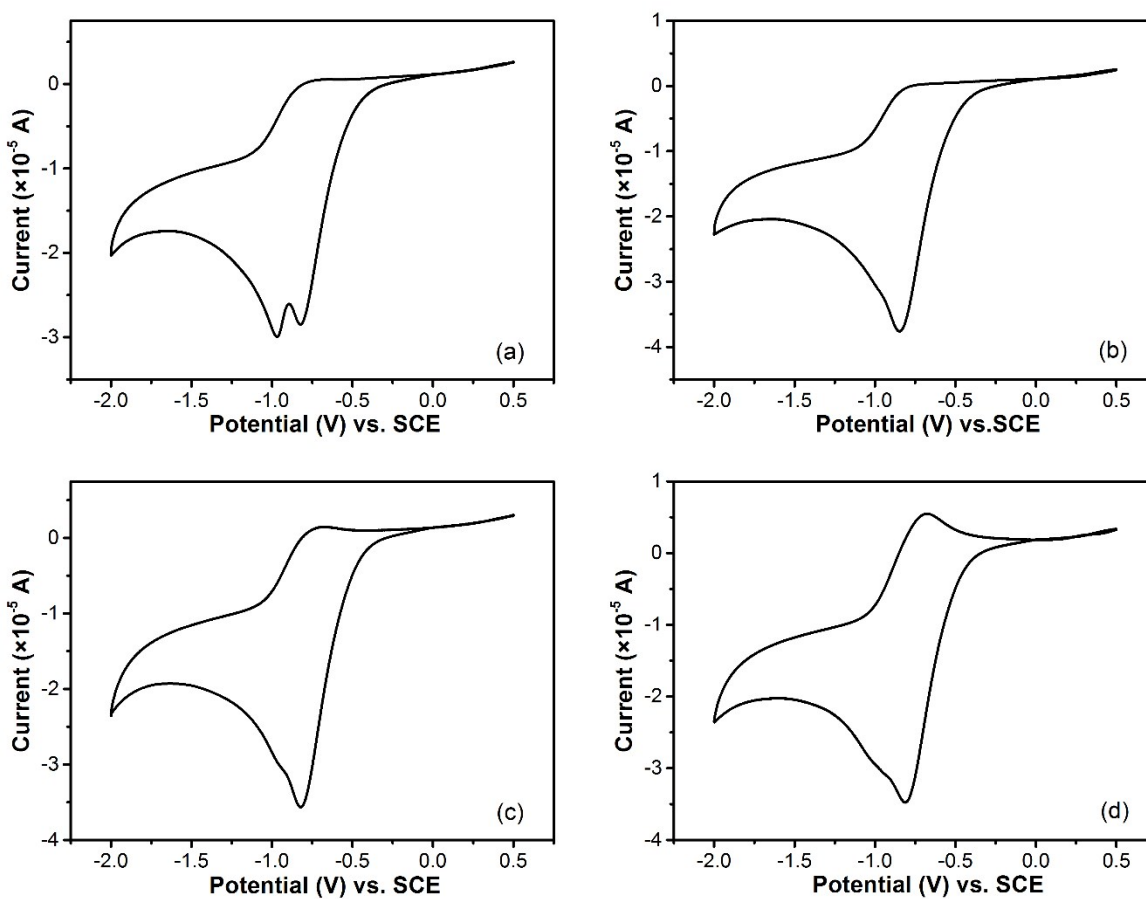

**Fig. S8.** Cyclic voltammograms of (a) DHeCzDCzBu; (b) QHeCzDCzBu; (c) DTPADCzBu; (d) QTPADCzBu in DMF ( $1 \times 10^{-3}$  M) using 0.1 M tetrabutyl ammonium hexafluorophosphate as the supporting electrolyte, recorded at  $100 \text{ mV s}^{-1}$  scan speed.

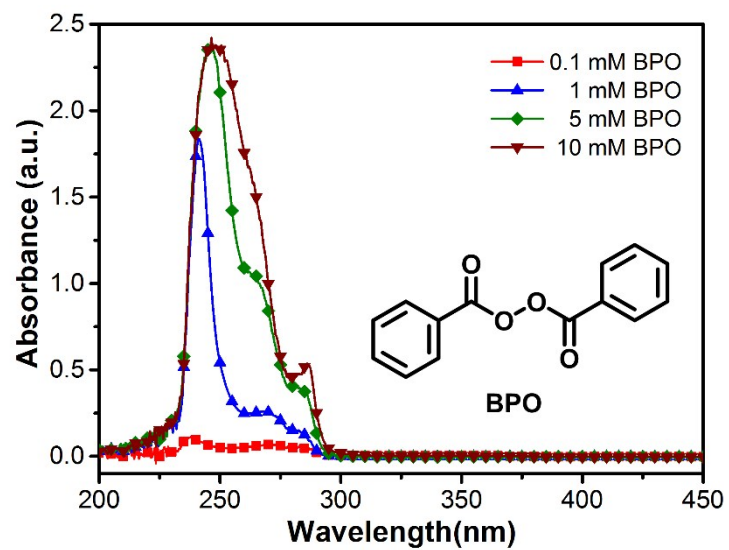

**Fig. S9.** UV-vis spectra of BPO in THF at different concentrations.

**Table S1.** The optimized structure and part data of selected bond lengths, angles and dihedral angles of **DHeCzDCzBu**

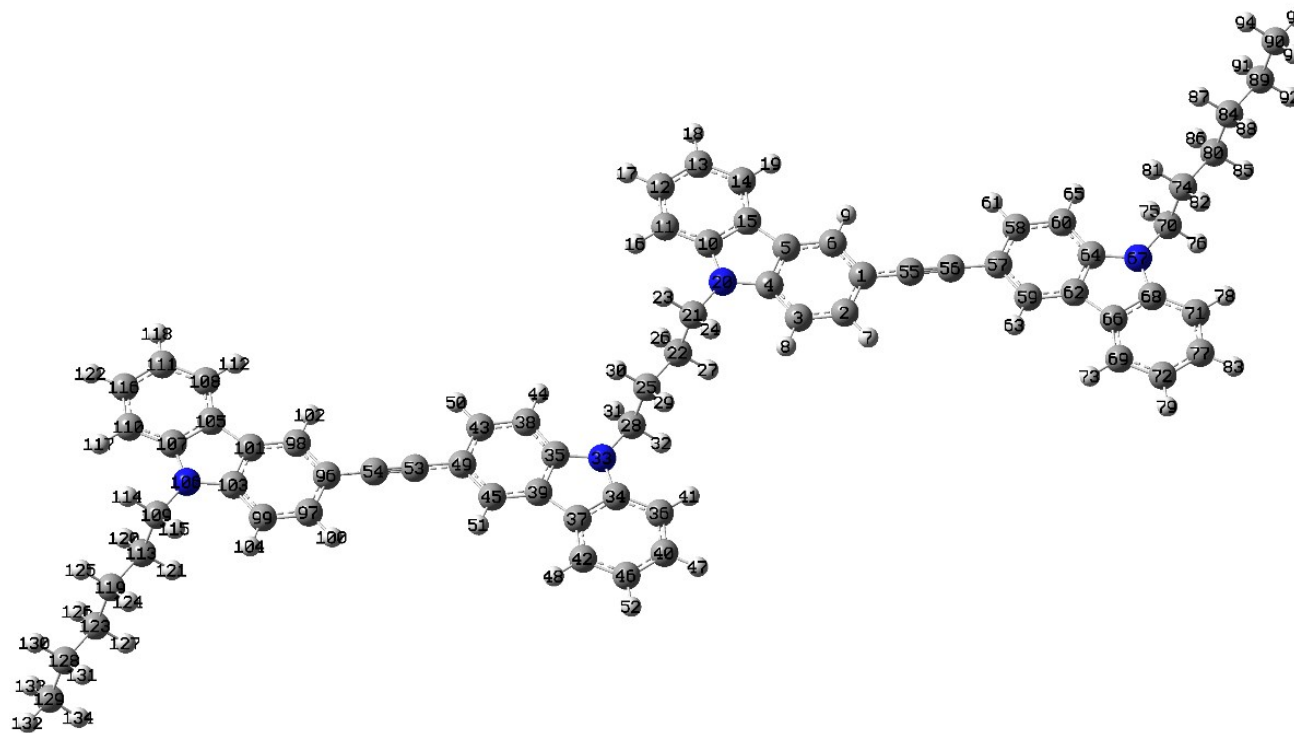

| Bond lengths(Å) |        | Bond angles(°)    |        | Dihedral angle(°)       |        |
|-----------------|--------|-------------------|--------|-------------------------|--------|
| N(20)-C(21)     | 1.4517 | C(4)-N(20)-C(21)  | 125.63 | C(3)-C(4)-N(20)-C(21)   | -3.93  |
| C(21)-C(22)     | 1.5371 | N(20)-C(21)-C(22) | 113.54 | C(4)-N(20)-C(21)-C(22)  | -87.61 |
| C(53)-C(54)     | 1.2173 | C(21)-C(22)-C(25) | 112.33 | C(43)-C(49)-C(96)-C(98) | 0.13   |
| N(67)-C(70)     | 1.4537 | N(67)-C(70)-C(74) | 113.75 | C(64)-N(67)-C(70)-C(74) | 87.77  |



**Table S2** The optimized structure and part data of selected bond lengths, angles and dihedral angles of QHeCzDCzBu

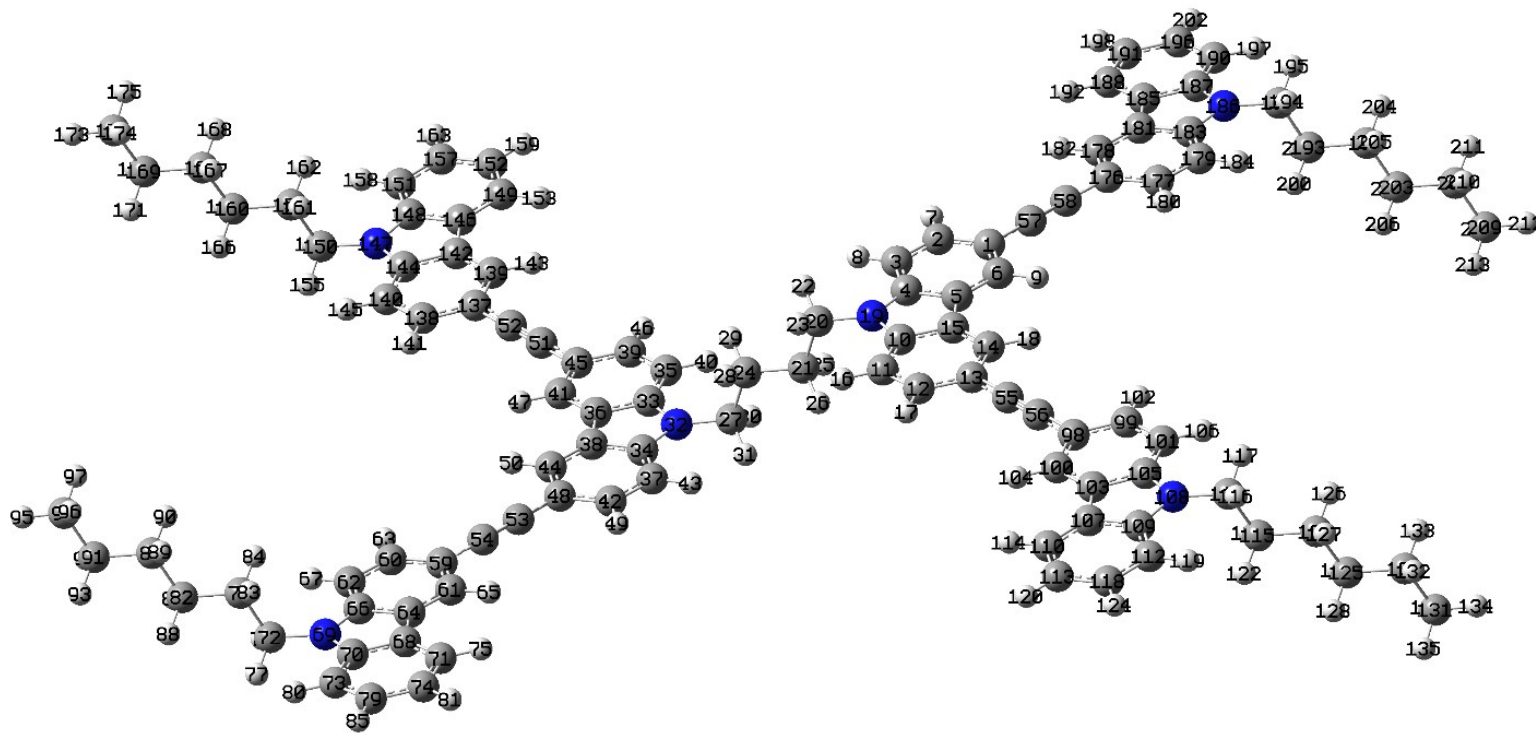

| Bond lengths(Å) |        | Bond angles(°)    |        | Dihedral angle(°)       |        |
|-----------------|--------|-------------------|--------|-------------------------|--------|
| N(19)-C(20)     | 1.4524 | C(4)-N(19)-C(20)  | 125.60 | C(3)-C(4)-N(19)-C(20)   | 4.27   |
| C(20)-C(21)     | 1.5368 | C(14)-C(13)-C(57) | 120.69 | C(4)-N(19)-C(20)-C(21)  | 87.01  |
| C(53)-C(54)     | 1.2173 | N(19)-C(20)-C(21) | 113.43 | C(14)-C(13)-C(98)-C(99) | 2.94   |
| N(69)-C(72)     | 1.4537 | C(66)-N(69)-C(72) | 125.69 | C(66)-N(69)-N(72)-C(76) | -87.95 |

**Table S3.** The optimized structure and part data of selected bond lengths, angles and dihedral angles of **DTPADCzBu**

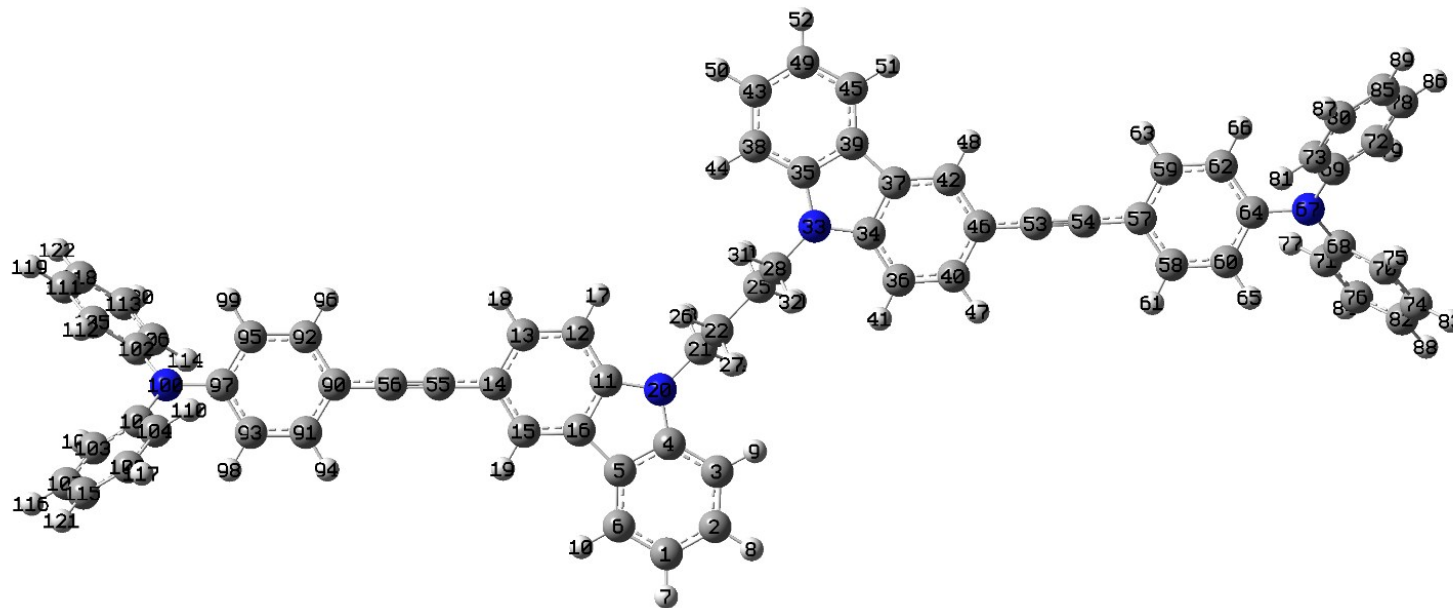

| Bond lengths(Å) |        | Bond angles(°)    |        | Dihedral angle(°)       |        |
|-----------------|--------|-------------------|--------|-------------------------|--------|
| N(20)-C(21)     | 1.4519 | C(4)-N(20)-C(21)  | 125.62 | C(3)-C(4)-N(20)-C(21)   | -4.00  |
| C(21)-C(22)     | 1.5370 | C(13)-C(14)-C(55) | 120.01 | C(4)-N(20)-C(21)-C(22)  | -87.00 |
| C(53)-C(54)     | 1.2176 | N(20)-C(21)-C(22) | 113.48 | C(13)-C(14)-C(90)-C(92) | 0.79   |
| C(64)-N(67)     | 1.4167 | C(64)-N(67)-C(68) | 120.26 | C(62)-C(64)-N(67)-C(69) | 38.65  |

**Table S4.** The optimized structure and part data of selected bond lengths, angles and dihedral angles of QTPADCzBu

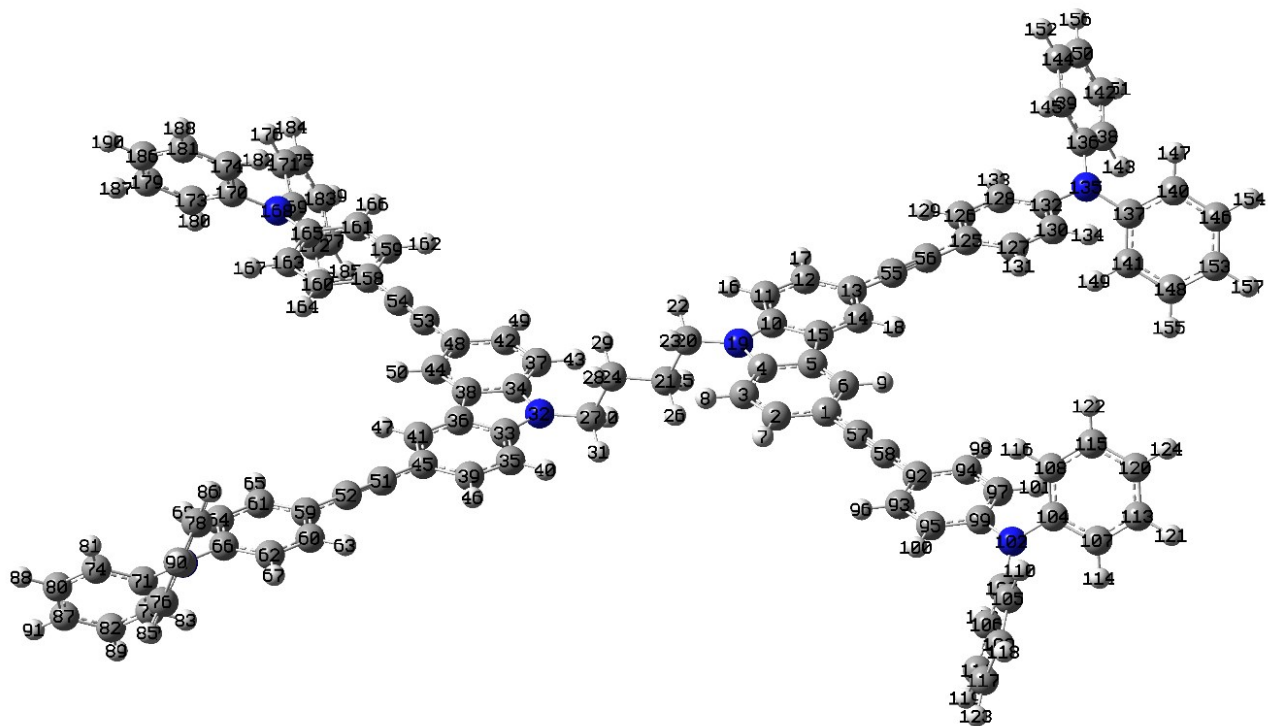

| Bond lengths(Å) |        | Bond angles(°)    |        | Dihedral angle(°)         |        |
|-----------------|--------|-------------------|--------|---------------------------|--------|
| C(27)-N(32)     | 1.4525 | C(4)-N(19)-C(20)  | 125.71 | C(3)-C(4)-N(19)-C(20)     | -2.45  |
| C(24)-C(27)     | 1.5367 | C(14)-C(13)-C(55) | 120.64 | C(4)-N(19)-C(20)-C(21)    | -88.34 |
| C(53)-C(54)     | 1.2175 | N(19)-C(20)-C(21) | 113.58 | C(14)-C(13)-C(125)-C(127) | -5.30  |
| C(66)-N(69)     | 1.4162 | C(66)-N(69)-C(70) | 120.20 | C(62)-C(66)-N(69)-C(70)   | 38.03  |

**Table S5.** UV-vis absorption data of **DCzBu** and DCzBus in THF and Toluene ( $1 \times 10^{-5}$  M)

| Compounds         | Solvents | $\lambda_1^a$ | $\epsilon_1^b$ | $\lambda_2^a$ | $\epsilon_2^b$ | $\lambda_3^a$ | $\epsilon_3^b$ |
|-------------------|----------|---------------|----------------|---------------|----------------|---------------|----------------|
| <b>DCzBu</b>      | THF      | 239           | 6.02           | 262           | 3.81           | 294           | 2.80           |
|                   | Toluene  | -             | -              | -             | -              | 294           | 3.01           |
| <b>DHeCzDCzBu</b> | THF      | 245           | 11.59          | 305           | 11.54          | 322           | 9.06           |
|                   | Toluene  | -             | -              | 305           | 12.21          | 322           | 9.35           |
| <b>QHeCzDCzBu</b> | THF      | 245           | 13.70          | 306           | 15.86          | -             | -              |
|                   | Toluene  | -             | -              | 306           | 16.39          | -             | -              |
| <b>DTPADCzBu</b>  | THF      | 240           | 7.49           | 291           | 6.33           | 355           | 8.51           |
|                   | Toluene  | -             | -              | 294           | 6.41           | 351           | 8.23           |
| <b>QTPADCzBu</b>  | THF      | 245           | 8.30           | 305           | 9.96           | 348           | 14.92          |
|                   | Toluene  | -             | -              | 307           | 9.59           | 351           | 13.95          |

<sup>a</sup> Wavelength (unit: nm) and <sup>b</sup> Molar absorption coefficient (unit:  $10^4 \text{ M}^{-1} \cdot \text{cm}^{-1}$ ) of *i*-th maximum absorption peak.

**Table S6.** Fluorescence data of **DCzBu** and DCzBus in THF and Toluene ( $1 \times 10^{-6}$  M)

| Compounds         | Data measured in THF            |                                 |          | Data measured in Toluene        |                                 |          |
|-------------------|---------------------------------|---------------------------------|----------|---------------------------------|---------------------------------|----------|
|                   | $\text{Ex}_{\text{max}}^a$ (nm) | $\text{Em}_{\text{max}}^b$ (nm) | $\Phi^d$ | $\text{Ex}_{\text{max}}^a$ (nm) | $\text{Em}_{\text{max}}^b$ (nm) | $\Phi^d$ |
| <b>DCzBu</b>      | 293                             | 350 (366) <sup>c</sup>          | 0.16     | 293                             | 351 (367) <sup>c</sup>          | 0.23     |
| <b>DHeCzDCzBu</b> | 304                             | 374 (391) <sup>c</sup>          | 0.25     | 305                             | 373 (391) <sup>c</sup>          | 0.36     |
| <b>QHeCzDCzBu</b> | 306                             | 405 (388) <sup>c</sup>          | 0.24     | 306                             | 405 (387) <sup>c</sup>          | 0.32     |
| <b>DTPADCzBu</b>  | 355                             | 389                             | 0.57     | 355                             | 386                             | 0.60     |
| <b>QTPADCzBu</b>  | 366                             | 390                             | 0.58     | 366                             | 390                             | 0.64     |

Maximum <sup>a</sup> excitation and <sup>b</sup> emission wavelength; <sup>c</sup> Wavelength of shoulder peak of maximum emission peak; <sup>d</sup> Quantum yield of fluorescence, relative to quinine sulfate (0.1 M H<sub>2</sub>SO<sub>4</sub> solution).

**Table S7.** The calculation outcomes of the TPA cross-sections of DCzBus under different excitation laser wavelengths

| Wavelength (nm) | $\sigma_{\text{TPA}}$ (GM) |            |           |           |
|-----------------|----------------------------|------------|-----------|-----------|
|                 | DHeCzDCzBu                 | QHeCzDCzBu | DTPADCzBu | QTPADCzBu |
| 720             | 8.88                       | 25.07      | 42.38     | 107.68    |
| 730             | 10.25                      | 24.69      | 42.71     | 112.68    |
| 740             | 5.90                       | 18.48      | 35.11     | 93.40     |
| 750             | 3.28                       | 15.07      | 32.78     | 94.36     |
| 760             | 1.30                       | 8.84       | 22.25     | 82.27     |
| 770             |                            | 2.81       | 8.53      | 47.33     |
| 780             |                            | 0.78       | 2.06      | 17.12     |
| 790             |                            |            | 1.03      | 7.47      |
| 800             |                            |            |           | 1.82      |
| 810             |                            |            |           | 1.89      |
